# Supplementary figures and images for: Cryo-EM structure of the CBC-ALYREF complex
Source: eLife journal article supplement (doi:10.7554/elife.91432), 2023-10-27

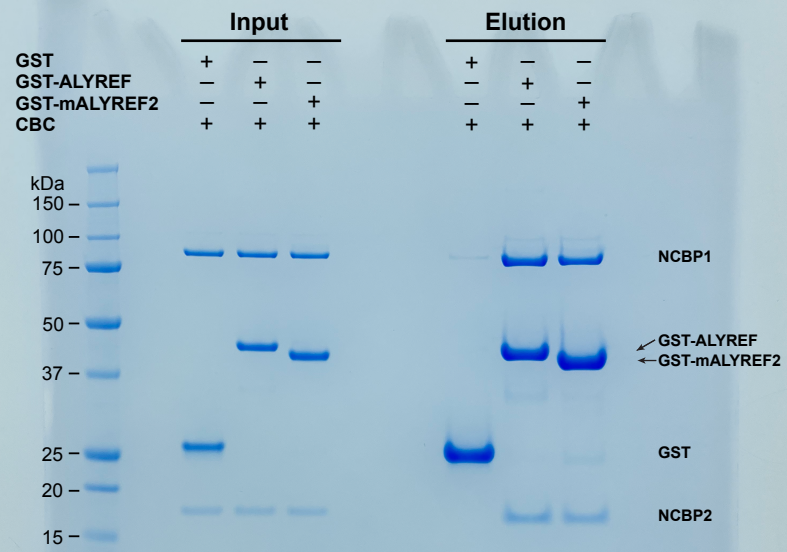

Supplement: fig1-data1 [file elife-91432-fig1-data1-v1.zip]

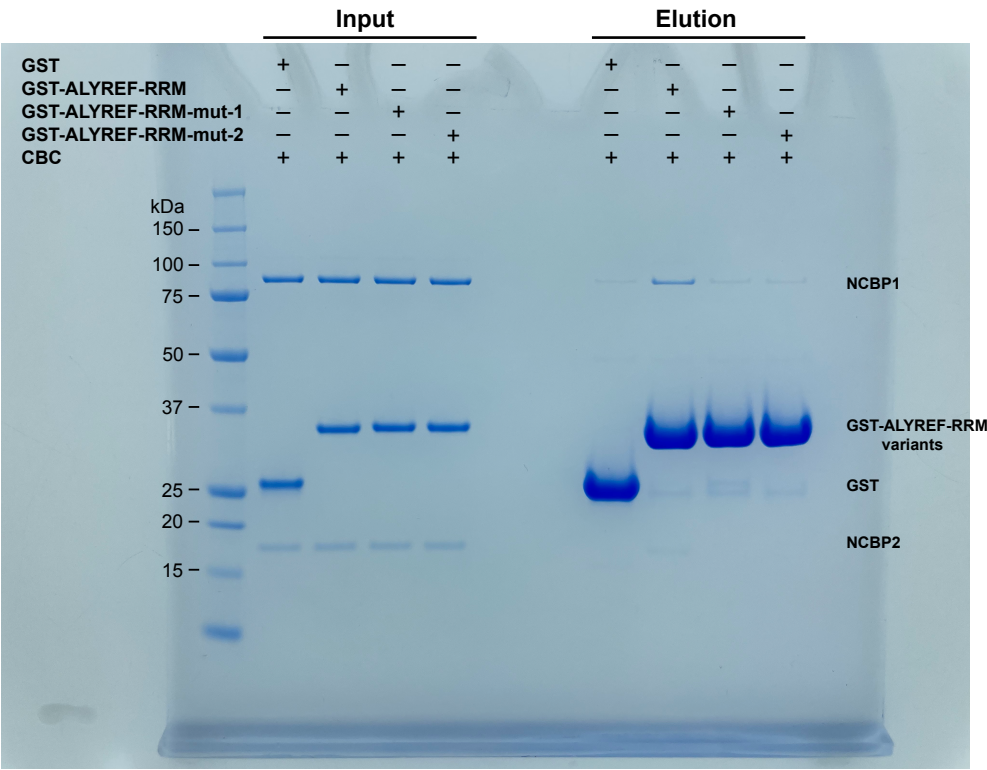

Supplement: fig4-data1 [file elife-91432-fig4-data1-v1.zip]
